# Supplementary material for: RasGRP1 is a causal factor in the development of l-DOPA–induced dyskinesia in Parkinson’s disease
Source: PubMed Central journal article supplement — Sci Adv. 2020 May 1;6(18):eaaz7001. doi: 10.1126/sciadv.aaz7001 (PMC7195186; doi:10.1126/sciadv.aaz7001), 2020-05-01
Supplement: aaz7001_SM.pdf [file aaz7001_SM.pdf]

## Supplementary Materials for

### **RasGRP1 is a causal factor in the development of L-DOPA–induced dyskinesia in Parkinson’s disease**

Mehdi Eshraghi, Uri Nimrod Ramírez-Jarquín, Neelam Shahani, Tommaso Nuzzo, Arianna De Rosa, Supriya Swarnkar, Nicole Galli, Oscar Rivera, George Tsapralis, Catherina Scharager-Tapia, Gogce Crynen, Qin Li, Marie-Laure Thiolat, Erwan Bezard, Alessandro Usiello\*, Srinivasa Subramaniam\*

\*Corresponding author. Email: [usiello@ceinge.unina.it](mailto:usiello@ceinge.unina.it) (A.U.); [ssubrama@scripps.edu](mailto:ssubrama@scripps.edu) (S.S.)

Published 1 May 2020, *Sci. Adv.* **6**, eaaz7001 (2020)  
DOI: 10.1126/sciadv.aaz7001

#### **The PDF file includes:**

Figs. S1 to S5

#### **Other Supplementary Material for this manuscript includes the following:**

(available at [advances.sciencemag.org/cgi/content/full/6/18/eaaz7001/DC1](https://advances.sciencemag.org/cgi/content/full/6/18/eaaz7001/DC1))

Data files S1 to S6

## Supplementary Figure legends:

**figure S1. Drag test comparison between WT and *RasGRP1*<sup>-/-</sup> mice.** Data shows drag test comparing the sham and 6-OHDA lesioned WT and *RasGRP1*<sup>-/-</sup> mice on day 3 and day 16 of vehicle or L-DOPA treatment. Error bars illustrate the means  $\pm$  SEM (n = 4-18), \* $P < 0.05$ ; \*\*\*\* $P < 0.0001$  by repeated measures Two-Way ANOVA followed by Bonferroni post hoc test.

**figure S2. Open field test comparison between WT and *RasGRP1*<sup>-/-</sup> mice.** Data shows open field test comparing the sham and 6-OHDA lesioned WT and *RasGRP1*<sup>-/-</sup> on day 5 of vehicle and L-DOPA treatment. Error bars illustrate the means  $\pm$  SEM (n = 4-18), n. s; not significant by Two-Way ANOVA followed by Bonferroni post hoc test.

**figure S3. Rotarod test comparison between WT and *RasGRP1*<sup>-/-</sup> mice.** Data shows rotarod test after 2 or 15 day of vehicle or L-DOPA treatment in the sham and 6-OHDA lesioned WT and *RasGRP1*<sup>-/-</sup> mice. Error bars illustrate the means  $\pm$  SEM (n = 4-18), n. s; not significant by repeated measures Two-Way ANOVA followed by Bonferroni post hoc test.

**figure S4. *RasGRP1* levels are upregulated by L-DOPA in 6-OHDA-lesioned animals.** Data shows Western blotting of indicated proteins from the intact and 6-OHDA-lesioned striatum of WT mice injected with vehicle or L-DOPA. Error bars illustrate the means  $\pm$  SEM (n = 3). \*\* $P < 0.01$ ; \*\*\*\* $P < 0.0001$  by One-Way ANOVA followed by Tukey's multiple comparison test.

**figure S5. Depletion of *RasGRP1* decreases mTORC1 activity.** Data shows Western blotting of the indicated proteins (A, B) and quantification (C) from HEK293 cells transfected with control or different *RasGRP1* shRNA. Error bars illustrate the means  $\pm$  SEM (n = 3/independent experiments). \*\*\* $P < 0.001$  by Student's *t* test. Arrow indicate the endogenous *RasGRP1* band. Jurkat cell lysates were used as positive control.

Drag test  
(day 3 of L-DOPA treatment)

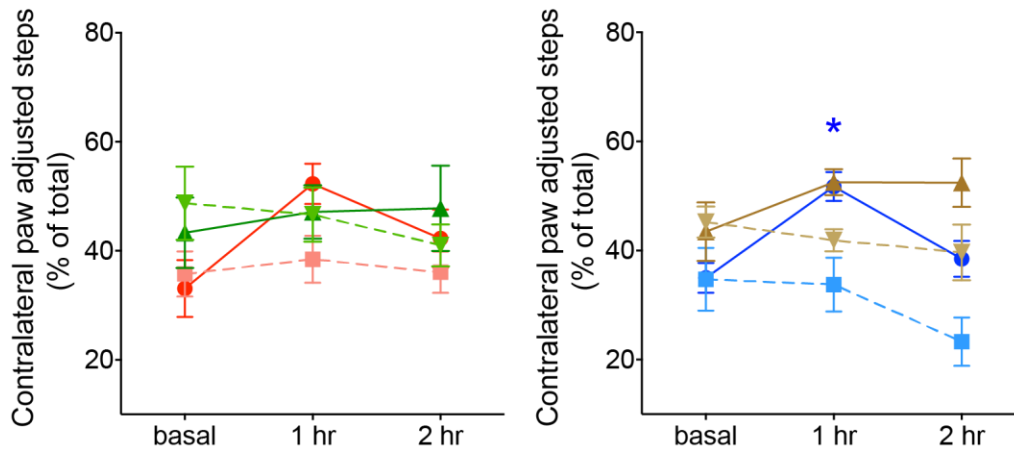

Drag test  
(day 16 of L-DOPA treatment)

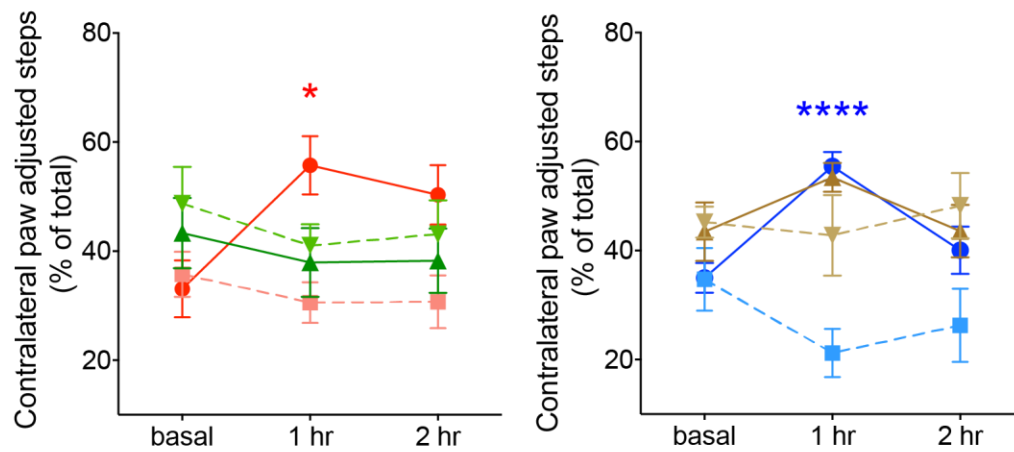

- WT: 6OHDA (L-DOPA) (n=10)
- WT: 6OHDA (vehicle) (n=4)
- *RasGRP1*<sup>-/-</sup>: 6OHDA (L-DOPA) (n=18)
- *RasGRP1*<sup>-/-</sup>: 6OHDA (vehicle) (n=7)
- ▲ WT: Sham (L-DOPA) (n=4)
- ▼ WT: Sham (vehicle) (n=4)
- ▲ *RasGRP1*<sup>-/-</sup>: Sham (L-DOPA) (n=4)
- ▼ *RasGRP1*<sup>-/-</sup>: Sham (vehicle) (n=4)

(basal levels were measured 5 days before starting L-DOPA treatment)

figure S1

Open field test  
(day 5 of L-DOPA treatment)

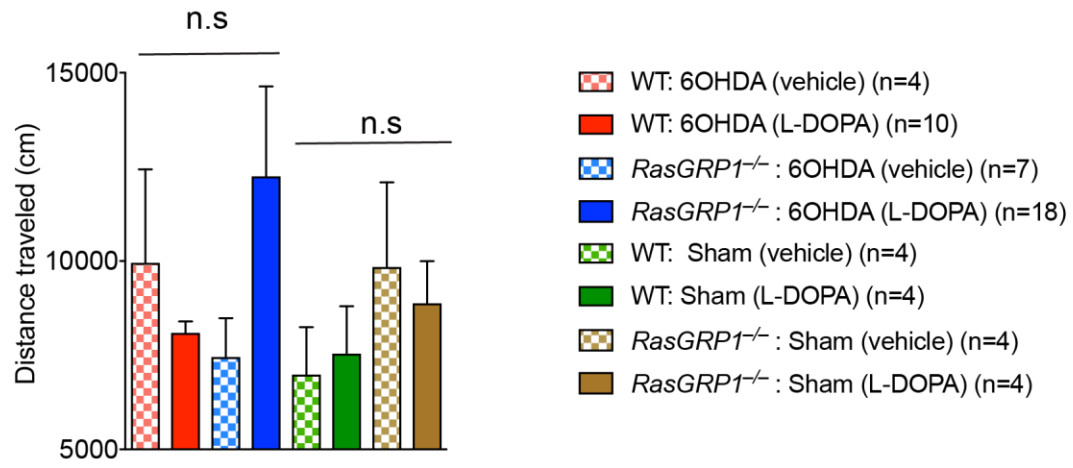

figure S2

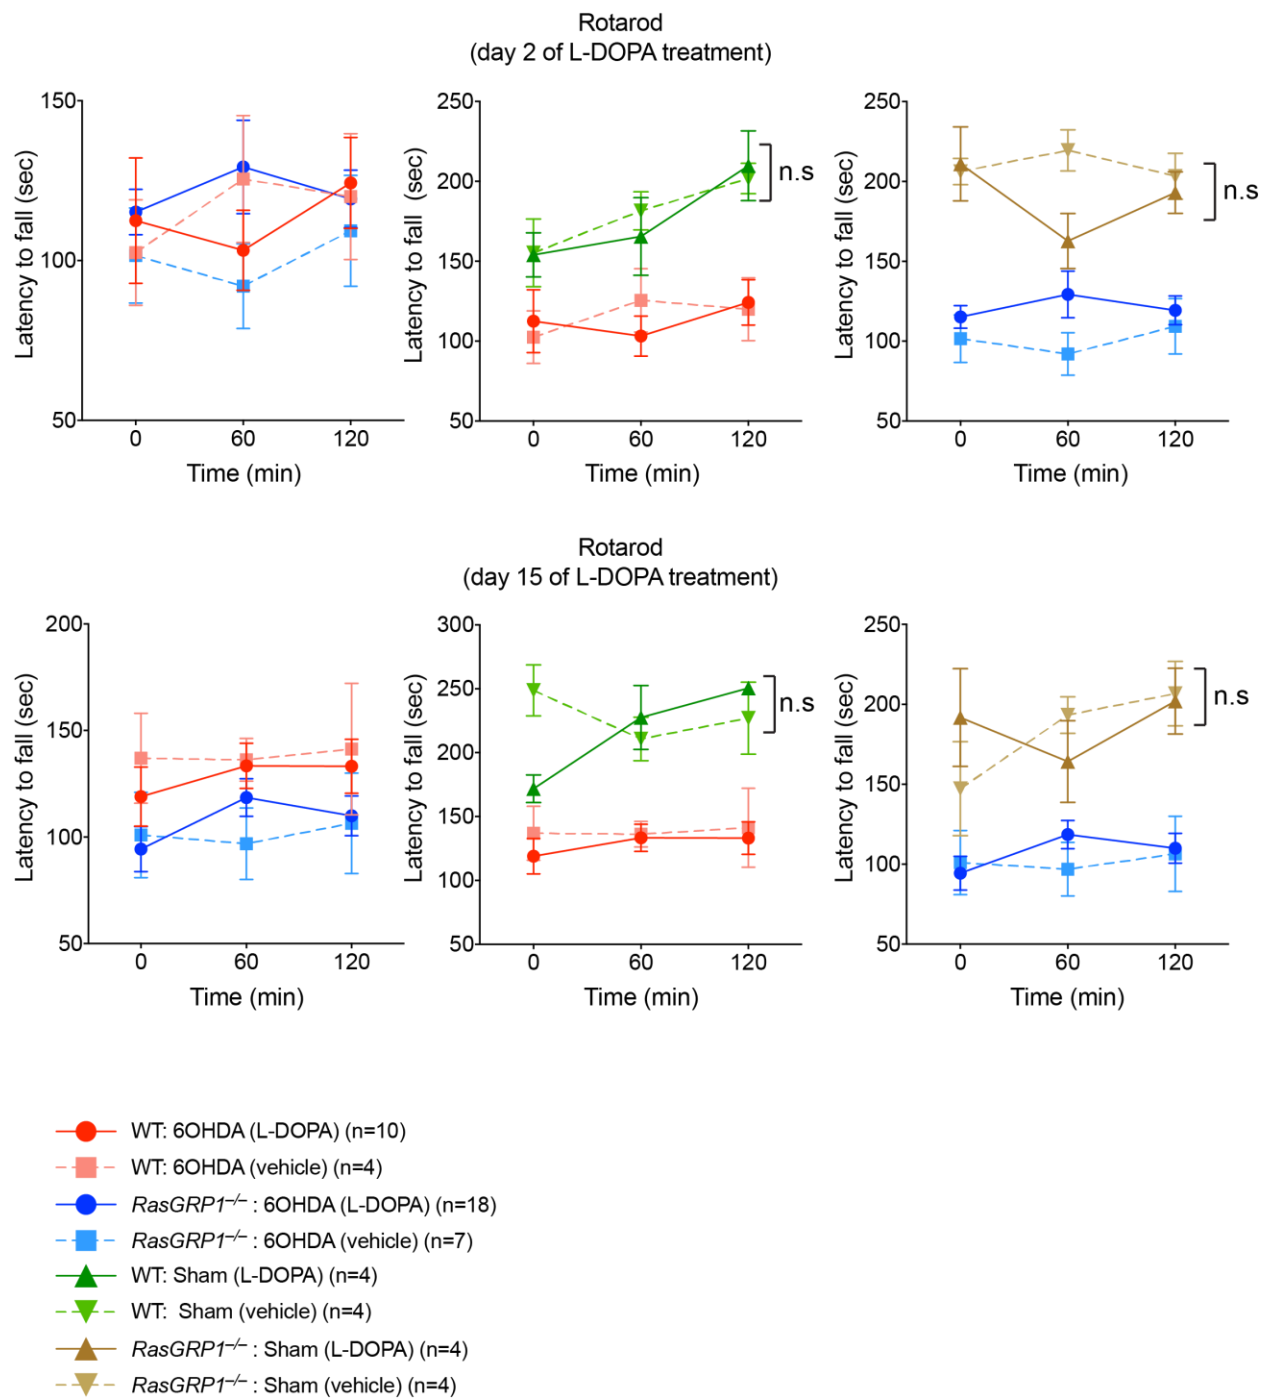

**figure S3**

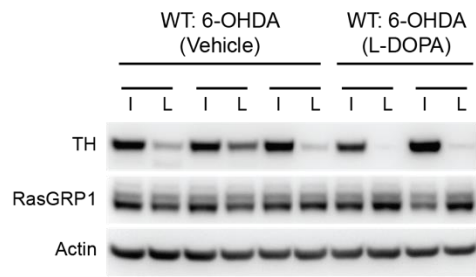

Intact (I) side  
6-OHDA Lesion (L) side

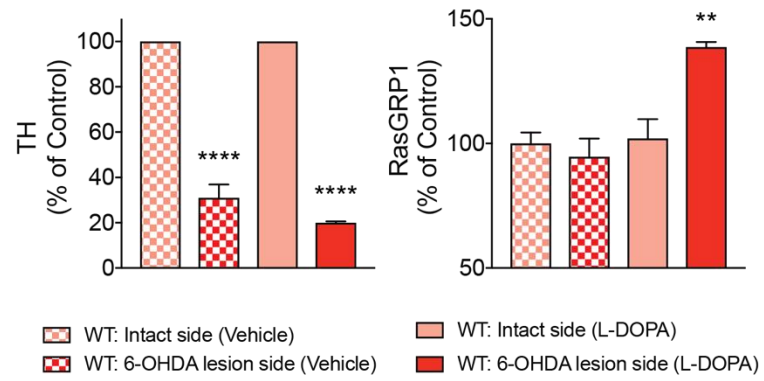

figure S4

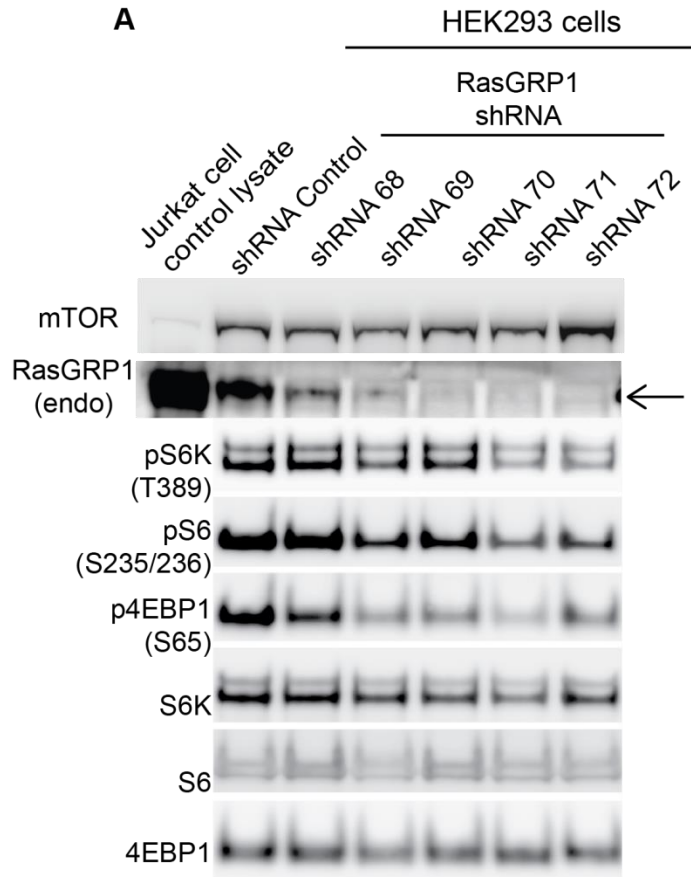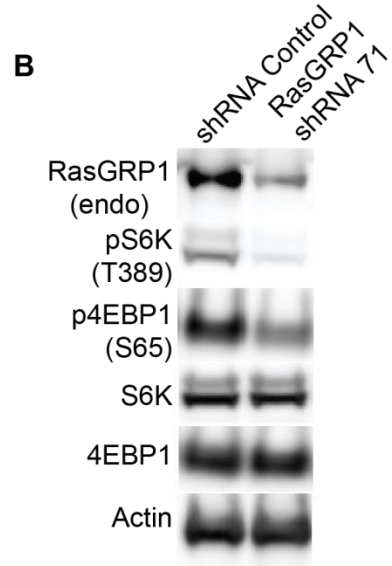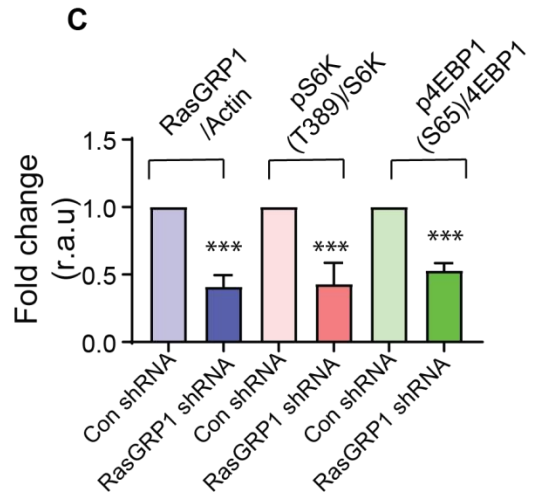

figure S5
